# Supplementary material for: Effects of land use types on soil erodibility in a small karst watershed in western Hubei
Source: PeerJ. 2022 Dec 1;10:e14423. doi: 10.7717/peerj.14423 (PMC9744158; doi:10.7717/peerj.14423)
Supplement: Data S1 [file peerj-10-14423-s001.xlsx]

## Sheet: Soil organic carbon
land use	land use	name		TOC(g/kg)	DOC(mg/kg)	LOC(g/kg)	HOC（g/kg）	Oxidative stability factor-KOS	soil carbon pool activity-A	DOC/TOC	LOC/TOC	depth（m）	Bulk density（Mg/m3）	SOC(%)	DOC(%)	LOC(%)	HOC(%)	SOC pool(Mg C/ha)	DOC pool(Mg C/ha)	Active carbon pool(Mg C/ha)	passive carbon pool(Mg C/ha)			SOC						DOC
Cypress forest	CF	XLX-S1	1	43.3229	46.5844	14.3981	28.9247	2.00892	0.497779	0.00107528	0.332345	0.1	0.985	4.33229	0.00465844	1.43981	2.89247	42.673	0.0458856	14.1822	28.4909			42.673	36.829	21.5993	52.3189	16.2767		0.04589	0.05719	0.04819	0.06043	0.01204
			2	44.6978	43.5313	15.5489	29.1489	1.87466	0.53343	0.000973903	0.347867	0.1	1.0057	4.46978	0.00435313	1.55489	2.91489	44.9526	0.0437795	15.6375	29.315			44.9526	35.7767	19.0593	37.6129	17.3797		0.04378	0.04955	0.03081	0.05906	0.0121
			3	45.0002	40.2852	14.6446	30.3557	2.07283	0.482432	0.000895223	0.325433	0.1	0.9287	4.50002	0.00402852	1.46446	3.03557	41.7917	0.0374129	13.6004	28.1913			41.7917	36.409	22.508	44.4029	20.9445		0.03741	0.04929	0.0496	0.05846	0.02577
		XLX-S3	4	95.052	31.0152	25.3546	69.6973	2.7489	0.363782	0.000326297	0.266745	0.1	1.1138	9.5052	0.00310152	2.53546	6.96973	105.869	0.0345447	28.24	77.6289			92.5001	29.3331	19.2287	34.8759	23.6011		0.03454	0.04119	0.02694	0.02632	0.0253
			5	93.3428	28.3631	23.2607	70.0821	3.0129	0.331906	0.00030386	0.249196	0.1	1.1364	9.33428	0.00283631	2.32607	7.00821	106.075	0.0322318	26.4334	79.6413			92.4134	28.1953	22.1481	42.843	22.6573		0.03223	0.03491	0.02493	0.03184	0.02898
			6	94.1974	29.6891	24.3077	69.8897	2.87521	0.3478	0.00031518	0.25805	0.1	1.1364	9.41974	0.00296891	2.43077	6.98897	107.046	0.0337387	27.6232	79.4227			38.3362	29.1815	25.5552	40.2131	24.6053		0.02993	0.03494	0.0324	0.0309	0.0238
		XLX-S4	7	86.765	28.0764	28.3156	58.4493	2.06421	0.484448	0.000323591	0.326349	0.1	1.0661	8.6765	0.00280764	2.83156	5.84493	92.5001	0.0299323	30.1873	62.3128			44.5424		12.0571	82.7695	20.0072		0.02825	0.05129	0.02853	0.05496	0.02805
			8	93.5093	31.0152	25.3546	68.1546	2.68806	0.372016	0.00033168	0.271146	0.1	1.2144	9.35093	0.00310152	2.53546	6.81546	113.558	0.0376648	30.7907	82.767			44.4915		18.2118	77.2335	23.1678		0.03454	0.04413	0.04039	0.05743	0.02887
			9	92.7838	28.3631	23.2607	69.5231	2.98887	0.334575	0.00030569	0.250698	0.1	0.996008	9.27838	0.00283631	2.32607	6.95231	92.4134	0.0282499	23.1678	69.2456					15.8857	77.629	22.2625		0.03226		0.03562	0.04686	0.02088
		XLX-S6	10	42.0837	37.9124	14.5022	27.5815	1.90189	0.525793	0.000900881	0.344603	0.1	0.91095	4.20837	0.00379124	1.45022	2.75815	38.3361	0.0345363	13.2108	25.1254									0.03336
			11	41.7801	30.2627	13.455	28.325	2.10516	0.475023	0.000724333	0.322045	0.1	1.06612	4.17801	0.00302627	1.3455	2.8325	44.5424	0.0322635	14.3446	30.1977			55.2126	32.6208	19.5837	54.4332	21.2113		0.035219	0.0453113	0.0352678	0.0473622	0.0228656
			12	43.1957	32.3899	11.3262	31.8695	2.81378	0.355394	0.000749842	0.262207	0.1	1.03	4.31957	0.00323899	1.13262	3.18695	44.4916	0.0333616	11.666	32.8255			23.0852	31.9194	3.99152	19.261	2.8462		0.00568203	0.00797117	0.00900328	0.0138961	0.00663877
		average value		67.9776	36.6245	18.1106	48.5001	2.42962	0.425365					6.79776	0.00366245	1.81106	4.85001	55.2126	0.0353001	20.757	52.097			0.418115	0.978499	0.203819	0.353846	0.134183		0.161334	0.17592	0.255284	0.293402	0.290339
		standard deviation		25.8189	6.36167	5.48816	20.2439	0.457006	0.0801982					2.58189	0.000636167	0.548816	2.02439	21.5943	0.00520936	7.58074	24.7212
		CV		0.379815	0.1737	0.303037	0.417398	0.188098	0.18854					0.0379815	1.737e-05	0.0303037	0.0417398	0.391111	0.147573	0.365214	0.474523
Economic forest	EF	XLX-S11	27	24.8459	38.5813	7.0137	17.8322	2.54248	0.393317	0.00155282	0.282288	0.1	1.4823	2.48459	0.00385813	0.70137	1.78322	36.829	0.057189	10.3964	26.4326
			28	25.4929	35.3086	6.50093	18.992	2.92143	0.342299	0.00138504	0.255009	0.1	1.4034	2.54929	0.00353086	0.650093	1.8992	35.7767	0.0495521	9.1234	26.6533
			29	25.2341	34.1619	9.61627	15.6178	1.62411	0.615724	0.0013538	0.381082	0.1	1.44285	2.52341	0.00341619	0.961627	1.56178	36.409	0.0492904	13.8748	22.5342
		XLX-S14	35	43.6234	34.9188	13.2394	30.384	2.29497	0.435735	0.000800461	0.303492	0.1	1.1795	4.36234	0.00349188	1.32394	3.0384	51.4538	0.0411867	15.6158	35.8379
			36	44.051	27.9419	13.8768	30.1743	2.17445	0.459887	0.000634307	0.315015	0.1	1.2495	4.4051	0.00279419	1.38768	3.01743	55.0418	0.0349134	17.339	37.7028
			37	43.8372	28.7651	14.9391	28.8981	1.9344	0.516956	0.00065618	0.340785	0.1	1.2145	4.38372	0.00287651	1.49391	2.88981	53.2403	0.0349352	18.1435	35.0968
		XLX-S18	45	21.9345	38.3506	6.34676	15.5878	2.45602	0.407163	0.00174841	0.28935	0.1	1.3373	2.19345	0.00383506	0.634676	1.55878	29.3331	0.0512863	8.48753	20.8455
			46	22.6997	35.5278	6.58903	16.1107	2.44507	0.408985	0.00156512	0.290269	0.1	1.2421	2.26997	0.00355278	0.658903	1.61107	28.1953	0.0441291	8.18423	20.0111
			47	22.1896	45.9371	7.0196	15.17	2.16109	0.46273	0.00207021	0.316347	0.1	1.3151	2.21896	0.00459371	0.70196	1.517	29.1815	0.0604119	9.23148	19.9501
		average value		30.4343	35.4992	9.46016	20.9741	2.28378	0.449199					3.04343	0.00354992	0.946016	2.09741
		standard deviation		10.135	5.37592	3.57887	6.75299	0.37309	0.0796357					1.0135	0.000537592	0.357887	0.675299
		CV		0.333012	0.151438	0.37831	0.321968	0.163365	0.177284					0.0333012	1.51438e-05	0.037831	0.0321968
Stone dike terrace	ST	XLX-S8	19	19.8249	44.2346	10.5532	9.27173	0.87857	1.13821	0.00223126	0.53232	0.1	1.0895	1.98249	0.00442346	1.05532	0.927173	21.5993	0.0481936	11.4977	10.1016
			20	18.6344	30.1237	8.25573	10.3787	1.25715	0.795451	0.00161656	0.443037	0.1	1.0228	1.86344	0.00301237	0.825573	1.03787	19.0593	0.0308105	8.44396	10.6153
				19.6697	43.3466	11.2802	8.38943	0.743729	1.34458	0.00220373	0.573484	0.1	1.1443	1.96697	0.00433466	1.12802	0.838943	22.508	0.0496015	12.908	9.60002
		XLX-S9	21	16.961	23.7608	3.88959	13.0714	3.36062	0.297564	0.0014009	0.229325	0.1	1.1337	1.6961	0.00237608	0.388959	1.30714	19.2287	0.0269376	4.40962	14.8191
			22	19.8941	22.3896	5.24461	14.6495	2.79325	0.358006	0.00112544	0.263626	0.1	1.1133	1.98941	0.00223896	0.524461	1.46495	22.1481	0.0249263	5.83882	16.3093
			23	20.9143	26.5131	5.03643	15.8779	3.15261	0.317197	0.0012677	0.240812	0.1	1.2219	2.09143	0.00265131	0.503643	1.58779	25.5552	0.0323964	6.15401	19.4012
		XLX-S15	38	10.8701	25.7218	4.13459	6.73548	1.62906	0.613852	0.0023663	0.380364	0.1	1.1092	1.08701	0.00257218	0.413459	0.673548	12.0571	0.0285306	4.58608	7.471
			39	12.3453	27.3769	4.43859	7.9067	1.78135	0.561371	0.0022176	0.359537	0.1	1.4752	1.23453	0.00273769	0.443859	0.79067	18.2118	0.0403864	6.54781	11.664
			40	12.2935	27.5682	4.64347	7.65007	1.64749	0.606984	0.00224249	0.377716	0.1	1.2922	1.22935	0.00275682	0.464347	0.765007	15.8857	0.0356236	6.00029	9.88542
		average value		16.823	30.115	6.38627	10.4368	1.91598	0.670357					1.6823	0.0030115	0.638627	1.04368	19.5837
		standard deviation		3.91455	8.0681	2.87378	3.31122	0.964549	0.365625					0.391455	0.00080681	0.287378	0.331122	20.3975
		CV		0.23269	0.267909	0.449993	0.317265	0.503423	0.545419					0.023269	2.67909e-05	0.0449993	0.0317265
Natural mixed forest	NF	XLX-S2	4	39.7802	45.9488	12.1477	27.6325	2.2747	0.439618	0.00115507	0.305371	0.1	1.3152	3.97802	0.00459488	1.21477	2.76325	52.3189	0.0604319	15.9767	36.3422
			5	40.2019	63.1226	11.9569	28.245	2.36224	0.423327	0.00157014	0.297421	0.1	0.9356	4.02019	0.00631226	1.19569	2.8245	37.6129	0.0590575	11.1869	26.4261
			6	39.4552	51.9458	12.2334	27.2218	2.22521	0.449397	0.00131658	0.310058	0.1	1.1254	3.94552	0.00519458	1.22334	2.72218	44.4029	0.0584598	13.7675	30.6354
		XLX-S10	24	33.7945	25.5083	8.69445	25.1	2.8869	0.346392	0.000754805	0.257274	0.1	1.032	3.37945	0.00255083	0.869445	2.51	34.8759	0.0263245	8.97268	25.9032
			25	37.4928	27.8619	7.51459	29.9782	3.98933	0.250669	0.000743128	0.200428	0.1	1.1427	3.74928	0.00278619	0.751459	2.99782	42.843	0.0318378	8.58692	34.2561
			26	36.9827	28.4163	7.20524	29.7774	4.13275	0.24197	0.000768367	0.194827	0.1	1.08735	3.69827	0.00284163	0.720524	2.97774	40.2131	0.0308984	7.83461	32.3785
		XLX-S17	42	84.4587	56.0848	22.8967	61.562	2.68868	0.37193	0.00066405	0.2711	0.1	0.98	8.44587	0.00560848	2.28967	6.1562	82.7695	0.0549631	22.4388	60.3307
			43	83.4235	62.0324	21.8383	61.5851	2.82005	0.354604	0.000743584	0.261777	0.1	0.9258	8.34235	0.00620324	2.18383	6.15851	77.2335	0.0574296	20.2179	57.0155
			44	83.5529	50.4324	22.3522	61.2007	2.73802	0.365227	0.000603599	0.267521	0.1	0.9291	8.35529	0.00504324	2.23522	6.12007	77.629	0.0468568	20.7674	56.8616
		average value		53.238	54.9278	17.2375	39.1448	2.90199	0.360348					5.3238	0.00549278	1.72375	3.91448	54.4332
		standard deviation		23.0112	14.8502	5.62469	16.7895	0.699934	0.074673					2.30112	0.00148502	0.562469	1.67895	19.261	0.374726
		CV		0.432231	0.270359	0.326305	0.428907	0.241191	0.207225					0.0432231	2.70359e-05	0.0326305	0.0428907	0.353846
Vegetable land	VF	XLX-S5	14	14.6228	10.8199	3.13539	11.4874	3.6638	0.272941	0.000739935	0.214418	0.1	1.1131	1.46228	0.00108199	0.313539	1.14874	16.2767	0.0120437	3.49	12.7867
			15	15.9169	11.0795	3.41615	12.5007	3.6593	0.273276	0.000696082	0.214624	0.1	1.0919	1.59169	0.00110795	0.341615	1.25007	17.3797	0.0120977	3.7301	13.6496
			16	15.3993	18.9455	2.9891	12.4102	4.15181	0.240859	0.00123029	0.194107	0.1	1.3601	1.53993	0.00189455	0.29891	1.24102	20.9445	0.0257678	4.06547	16.8791
		XLX-S12	29	22.8272	24.4753	5.74822	17.079	2.97118	0.336566	0.0010722	0.251814	0.1	1.0339	2.28272	0.00244753	0.574822	1.7079	23.6011	0.025305	5.94308	17.658
			30	23.7199	30.3386	7.12219	16.5977	2.33043	0.429106	0.00127904	0.300262	0.1	0.9552	2.37199	0.00303386	0.712219	1.65977	22.6573	0.0289794	6.80311	15.8541
			31	24.7401	23.9284	5.43384	19.3063	3.55297	0.281454	0.00096719	0.219637	0.1	0.99455	2.47401	0.00239284	0.543384	1.93063	24.6053	0.023798	5.40422	19.2011
		XLX-S13	32	22.4446	31.4662	7.00874	15.4359	2.20238	0.454055	0.00140195	0.312268	0.1	0.8914	2.24446	0.00314662	0.700874	1.54359	20.0072	0.028049	6.2476	13.7596
			33	24.4851	30.5112	6.55201	17.9331	2.73703	0.365359	0.00124611	0.267592	0.1	0.9462	2.44851	0.00305112	0.655201	1.79331	23.1678	0.0288697	6.19951	16.9683
			34	24.23	22.7295	7.8079	16.4221	2.10327	0.475451	0.000938073	0.322241	0.1	0.9188	2.423	0.00227295	0.78079	1.64221	22.2625	0.0208839	7.1739	15.0886
		average value		20.9318	22.6994	5.46817	15.4636	3.04135	0.347674					2.09318	0.00226994	0.546817	1.54636	21.2113
		standard deviation		4.28986	7.83534	1.85864	2.72928	0.745906	0.0877679					0.428986	0.000783534	0.185864	0.272928
		CV		0.204945	0.345179	0.339901	0.176497	0.245255	0.252443					0.0204945	3.45179e-05	0.0339901	0.0176497

## Sheet: physical property
	land use		Ring cutter+ Fresh soil(m)	Ring cutter+soil(m1)	2h after dry sand absorbs water,ring cutter+soil（m2）	ring cutter+soil, after 2 days（m3）	Ring cutter+Dry soil weight(m4)	Ring cutter(m0)	saturated water content	capillary water capacity	田间含水量	Natural moisture content	Bulk density	Non capillary porosity	capillary porosity	Total porosity	Soil void ratio	Saturated water holding capacity of soil（mm）	Soil water storage capacity（t/hm2）	Capillary water holding capacity（t/hm2）
S1	CF	1	218.97	244.33	235.2	228.03	194.43	95.93	0.506599	0.413909	0.341117	0.249137	0.985	0.0913	0.4077	0.499	0.996008	49.9	91.3	407.7
		2	230.56	249.9	241.91	235.08	202.23	97.3	0.454303	0.378157	0.313066	0.26999	1.0493	0.0799	0.3968	0.4767	0.91095	47.67	79.9	396.8
		3	210.85	243.76	232.12	220.39	192.16	99.29	0.555615	0.430279	0.303973	0.201249	0.9287	0.1164	0.3996	0.516	1.06612	51.6	116.4	399.6
S3		4	240.93	262.18	252.69	248	212.1	100.72	0.449632	0.364428	0.32232	0.258844	1.1138	0.0949	0.4059	0.5008	1.00321	50.08	94.9	405.9
		5	241.86	264.53	255.18	250.14	213.73	100.09	0.447026	0.364748	0.320398	0.247536	1.1364	0.0935	0.4145	0.508	1.03252	50.8	93.5	414.5
		6	241.395	263.355	253.935	249.07	212.915	100.405	0.448316	0.36459	0.321349	0.253133	1.1251	0.0942	0.4102	0.5044	1.01776	50.44	94.2	410.2
S4		7	220.39	252.7	242.5	226.86	205.05	98.44	0.446956	0.35128	0.204577	0.143889	1.0661	0.102	0.3745	0.4765	0.91022	47.65	102	374.5
		8	248.88	268.63	266.33	260.5	219.66	98.22	0.403244	0.384305	0.336298	0.240613	1.2144	0.023	0.4667	0.4897	0.959632	48.97	23	466.7
		9	234.635	260.665	254.415	243.68	212.355	98.33	0.423679	0.368866	0.27472	0.195396	1.14025	0.0625	0.4206	0.4831	0.93461	48.31	62.5	420.6
								average value	0.482635	0.390304	0.320175	0.245351	1.05777	0.0960286	0.401314	0.497343	0.990968
								standard deviation	0.0475929	0.0301056	0.0137499	0.0262355	0.077407	0.0111367	0.0132725	0.0152026	0.0594275
								CV	0.0986106	0.0771336	0.0429451	0.10693	0.0731793	0.115973	0.0330725	0.0305677	0.0599691
S11	EF	1	280.43	288.77	286.17	279.9	247.8	99.57	0.276395	0.258854	0.216555	0.220131	1.4823	0.026	0.3837	0.4097	0.694054	409.7	26	383.7
		2	268.07	282.34	277.04	271.29	237.22	96.88	0.321505	0.283739	0.242768	0.219823	1.4034	0.053	0.3982	0.4512	0.822157	451.2	53	398.2
		3	274.25	285.555	281.605	275.595	242.51	98.225	0.298333	0.270957	0.229303	0.219981	1.44285	0.0395	0.39095	0.43045	0.755772	430.45	39.5	390.95
S14		4	236.64	261.99	248.29	242.13	214.11	96.16	0.405935	0.289784	0.237558	0.191013	1.1795	0.137	0.3418	0.4788	0.918649	478.8	137	341.8
		5	251.13	271.38	263.43	256.82	221.8	96.85	0.396799	0.333173	0.280272	0.234734	1.2495	0.0795	0.4163	0.4958	0.98334	495.8	79.5	416.3
		6	243.885	266.685	255.86	249.475	217.955	96.505	0.401235	0.312104	0.259531	0.213503	1.2145	0.10825	0.37905	0.4873	0.950458	487.3	108.25	379.05
S18		7	253.24	270.94	267.21	259.66	229.2	95.47	0.312121	0.284229	0.227772	0.179765	1.3373	0.0373	0.3801	0.4174	0.716444	417.4	37.3	380.1
		8	248.58	268.48	257.05	249.85	219.69	95.48	0.392803	0.300781	0.242815	0.23259	1.2421	0.1143	0.3736	0.4879	0.952744	487.9	114.3	373.6
		9	260.23	275.29	268.86	261.78	230.7	99.19	0.339062	0.290168	0.236332	0.224546	1.3151	0.0643	0.3816	0.4459	0.804728	445.9	64.3	381.6
								average value	0.34856	0.294721	0.243721	0.21787	1.3206	0.06895	0.387507	0.456457	0.846275
								standard deviation	0.0490184	0.0236476	0.0209547	0.0183739	0.0964249	0.0389991	0.0200471	0.0326203	0.109945
								CV	0.140631	0.0802373	0.0859783	0.0843341	0.073016	0.565614	0.0517334	0.0714641	0.129917
S8	ST	1	234.49	262.48	255.3	249.69	205.36	96.41	0.524277	0.458375	0.406884	0.26737	1.0895	0.0718	0.4994	0.5712	1.33209	571.2	71.8	499.4
		2	219.85	251.69	232.52	228.1	196.95	94.67	0.535197	0.347771	0.304556	0.223895	1.0228	0.1917	0.3557	0.5474	1.20946	547.4	191.7	355.7
		3	231.15	264.66	261.33	255.34	211.8	97.37	0.461942	0.432841	0.380495	0.169099	1.1443	0.0333	0.4953	0.5286	1.12134	528.6	33.3	495.3
S9		4	233.57	269.79	264.77	256.84	213.81	100.44	0.493781	0.449502	0.379554	0.174297	1.1337	0.0502	0.5096	0.5598	1.27169	559.8	50.2	509.6
		5	229.63	260.42	251.42	245.801	206.33	95	0.485853	0.405012	0.354541	0.209288	1.1133	0.09	0.4509	0.5409	1.17817	540.9	90	450.9
		6	244	268.56	258.13	252.86	219.7	97.51	0.399869	0.31451	0.271381	0.198871	1.2219	0.1043	0.3843	0.4886	0.955417	488.6	104.3	384.3
S15		7	228.44	259.03	251.28	242.86	206.07	95.15	0.477461	0.407591	0.33168	0.201677	1.1092	0.0775	0.4521	0.5296	1.12585	529.6	77.5	452.1
		8	266.19	290.09	287.79	278.57	246.83	99.31	0.293248	0.277657	0.215157	0.131236	1.4752	0.023	0.4096	0.4326	0.762425	432.6	23	409.6
		9	247.315	274.56	269.535	260.715	226.45	97.23	0.372311	0.333424	0.265168	0.161469	1.2922	0.05025	0.43085	0.4811	0.927154
								average value	0.449327	0.380743	0.323268	0.193022	1.17801	0.0768944	0.443083	0.519978	1.09818
								standard deviation	0.0790494	0.0643412	0.0638253	0.0396714	0.135662	0.0504444	0.0534171	0.044296	0.18278
								CV	0.175928	0.168989	0.197437	0.205527	0.115162	0.656021	0.120558	0.0851883	0.166439
S2	NF	1	255.63	271.18	263.05	256.04	228.26	96.74	0.326338	0.264523	0.211223	0.208105	1.3152	0.0813	0.3479	0.4292	0.751927	429.2	81.3	347.9
		2	218.49	245.13	225.91	217.89	187.82	94.26	0.612548	0.407118	0.321398	0.327811	0.9356	0.1922	0.3809	0.5731	1.34247	573.1	192.2	380.9
		3	237.06	258.155	244.48	236.965	208.04	95.5	0.445308	0.323796	0.25702	0.257864	1.1254	0.13675	0.3644	0.50115	1.00461	501.15	136.75	364.4
S10		4	237.2	254.3	244.8	241.97	200.07	96.87	0.525484	0.43343	0.406008	0.359787	1.032	0.095	0.4473	0.5423	1.18484	542.3	95	447.3
		5	250.15	266.72	256.62	250.14	213.88	99.61	0.462414	0.374026	0.317319	0.317406	1.1427	0.101	0.4274	0.5284	1.12044	528.4	101	427.4
		6	243.675	260.51	250.71	246.055	206.975	98.24	0.492344	0.402216	0.359406	0.337518	1.08735	0.098	0.43735	0.53535	1.15216	535.35	98	437.35
S17		7	211.23	248.52	230.02	225.42	188.65	96.07	0.646684	0.446857	0.39717	0.243897	0.9258	0.185	0.4137	0.5987	1.4919	598.7	185	413.7
		8	216.29	246.18	230.3	224.14	188.44	95.53	0.621462	0.450544	0.384243	0.299752	0.9291	0.1588	0.4186	0.5774	1.3663	577.4	158.8	418.6
		9	213.76	247.35	230.16	224.78	188.545	95.8	0.63405	0.448703	0.390695	0.271874	0.92745	0.1719	0.41615	0.58805	1.42748	588.05	171.9	416.15
								average value	0.555037	0.410836	0.354157	0.301989	1.01317	0.142331	0.413225	0.555556	1.26127
								standard deviation	0.0826225	0.0444613	0.0516474	0.0409545	0.0950918	0.040352	0.0278016	0.0337717	0.16983
								CV	0.148859	0.108221	0.145832	0.135616	0.0938552	0.283508	0.0672796	0.0607889	0.13465
S5	VF	1	225.26	260.44	249.33	243.94	206.88	95.57	0.481179	0.381367	0.332944	0.165124	1.1131	0.1111	0.4245	0.5356	1.15332	535.6	111.1	424.5
		2	220.99	257.6	251.24	240.52	204.33	95.14	0.487865	0.429618	0.331441	0.152578	1.0919	0.0636	0.4691	0.5327	1.13995	532.7	63.6	469.1
		3	252.49	280.87	263.94	257.79	233.19	97.18	0.350562	0.226086	0.180869	0.141901	1.3601	0.1693	0.3075	0.4768	0.911315	476.8	169.3	307.5
S12		4	222.83	257.39	240.89	235.63	201.1	97.71	0.544443	0.384853	0.333978	0.210175	1.0339	0.165	0.3979	0.5629	1.28781	562.9	165	397.9
		5	209.42	248.67	241.28	235.23	192.27	96.75	0.590452	0.513086	0.449749	0.179544	0.9552	0.0739	0.4901	0.564	1.29358	564	73.9	490.1
		6	216.125	253.03	241.085	235.43	196.685	97.23	0.566538	0.446433	0.389573	0.195465	0.99455	0.11945	0.444	0.56345	1.29069	563.45	119.45	444
S13		7	203.26	244.89	236.59	230.32	188.96	99.82	0.62744	0.534328	0.463989	0.160422	0.8914	0.083	0.4763	0.5593	1.26912	559.3	83	476.3
		8	207.17	252.31	237.41	230.86	191.76	97.14	0.639928	0.482456	0.413232	0.162862	0.9462	0.149	0.4565	0.6055	1.53485	605.5	149	456.5
		9	205.215	248.6	237	230.59	190.36	98.48	0.63387	0.507619	0.437854	0.161678	0.9188	0.116	0.4664	0.5824	1.39464	582.4	116	466.4
								average value	0.54692	0.433983	0.370403	0.169972	1.03391	0.116706	0.436922	0.553628	1.25281
								standard deviation	0.0944365	0.0953123	0.0880175	0.0214545	0.143627	0.0386806	0.0560618	0.0362392	0.174465
								CV	0.17267	0.219622	0.237626	0.126224	0.138917	0.331437	0.128311	0.0654578	0.13926
					247.315	274.56	269.535	260.715	226.45	97.23

## Sheet: soil texture
land use	name		sand	silt	clay	Soil texture type
CF	XLX-S1	1	45.5102	34.2402	20.2496	loam
		2	47.1486	34.8525	17.9989	loam
		3	43.629	37.7171	18.654	loam
	XLS-S3	4	37.5657	45.7093	16.725	loam
		5	30.5358	52.4457	17.0185	Silty loam
		6	31.0364	50.2587	18.7048	Silty loam
	XLX-S4	7	28.4722	49.6984	21.8294	loam
		8	30.0134	42.4594	27.5272	Clay loam
		9	35.9609	40.1543	23.8849	loam
	XLX-S6	10	28.7089	48.4741	22.817	loam
		11	31.3493	45.6851	22.9656	loam
		12	26.0685	51.2631	22.6684	loam
EF	XLX-S11	13	34.9113	50.2101	14.8786	Silty loam
		14	36.0946	51.5626	12.3427	Silty loam
		15	37.278	52.2562	10.4658	Silty loam
	XLX-S18	16	14.5641	61.307	24.1289	Silty loam
		17	17.382	60.5758	22.0423	Silty loam
		18	12.8293	62.9248	24.2459	Silty loam
	XLX-S14	19	26.6014	51.9091	21.4895	Silty loam
		20	33.2792	44.0065	22.7143	loam
		21	30.9242	48.1412	20.9345	loam
ST	XLX-S8	22	14.583	61.3126	24.1044	Silty loam
		23	14.3424	61.5911	24.0665	Silty loam
		24	14.1019	61.8695	24.0286	Silty loam
	XLX-S9	25	14.1019	61.8695	24.0286	Silty loam
		26	11.9227	63.7773	24.3	Silty loam
		27	15.0142	64.2496	20.7362	Silty loam
	XLX-S15	28	19.1723	78.5312	2.29647	Silty loam
		29	19.8871	77.9377	2.1752	Silty loam
		30	19.9085	77.3247	2.76674	Silty loam
NF	XLX-S2	31	34.8864	45.1792	19.9344	loam
		32	31.1234	48.6957	20.1809	loam
		33	33.006	47.1001	19.894	loam
	XLX-S10	34	32.984	42.2225	24.7935	loam
		35	34.7107	40.4425	24.8468	loam
		36	25.2181	53.9672	20.8147	Silty loam
	XLX-S17	37	29.6643	50.0244	20.3113	Silty loam
		38	25.8449	52.8188	21.3363	Silty loam
		39	22.0256	55.6131	22.3613	Silty loam
VF	XLX-S12	40	18.2103	61.4128	20.377	Silty loam
		41	15.9367	63.3794	20.6838	Silty loam
		42	25.5942	58.7077	15.6981	Silty loam
	XLX-S13	43	19.7574	61.9003	18.3423	Silty loam
		44	23.4504	59.5341	17.0155	Silty loam
		45	19.3137	62.1101	18.5761	Silty loam
	XLX-S5	46	24.1505	67.0865	8.76299	Silty loam
		47	22.7605	68.2649	8.97457	Silty loam
		48	22.7884	67.694	9.51754	Silty loam

## Sheet: PSD
			Gravel			Coarse sand	fine sand	sand				silt	soil clay
编号	2-1.5mm	1.5-1mm	2-1mm	1-0.5mm	0.5-0.25mm	1~0.25mm	0.25-0.05mm	2~0.05mm	0.05-0.02mm	0.02-0.01mm	0.01-0.002mm	0.05~0.002mm	<0.002mm
XLX-S1	0.0829722	0.0332891	0.116261	0.106985	0.0620272	0.169013	0.169828	0.455102	0.165269	0.0769076	0.100225	0.342402	0.202496
	0.0740921	0.0284608	0.102553	0.11326	0.0671278	0.180388	0.188545	0.471486	0.207397	0.0404976	0.10063	0.348525	0.179989
	0.0570051	0.0345978	0.0916029	0.113264	0.0635504	0.176814	0.167873	0.43629	0.184085	0.0552256	0.13786	0.377171	0.18654
XLX-S2	0.0202204	0.00988551	0.0301059	0.043147	0.0342827	0.0774297	0.241328	0.348864	0.256533	0.0314539	0.163805	0.451792	0.199344
	0.0293318	0.0127152	0.042047	0.0402699	0.0283922	0.0686621	0.200525	0.311234	0.285556	0.0563758	0.145025	0.486957	0.201809
	0.0237747	0.00614793	0.0299226	0.0265321	0.026287	0.0528191	0.247318	0.33006	0.292078	0.042484	0.136439	0.471001	0.19894
XLS-S3	0.0186418	0.00668789	0.0253297	0.0264356	0.0205271	0.0469627	0.303364	0.375657	0.240553	0.071197	0.145343	0.457093	0.16725
	0.0226633	0.00870936	0.0313726	0.0387129	0.0227686	0.0614815	0.212504	0.305358	0.275498	0.0724551	0.176504	0.524457	0.170185
	0.0369989	0.0213062	0.0583052	0.0676049	0.0469095	0.114514	0.137545	0.310364	0.282258	0.0606643	0.159665	0.502587	0.187048
XLX-S4	0.0290663	0.0192625	0.0483287	0.103064	0.0718082	0.174872	0.0615211	0.284722	0.215705	0.0724769	0.208803	0.496984	0.218294
	0.029583	0.0123576	0.0419405	0.079658	0.074038	0.153696	0.0599005	0.255537	0.203309	0.0872552	0.229958	0.520522	0.223941
	0.0282522	0.151118	0.17937	0.0545026	0.0212622	0.0757647	0.0449987	0.300134	0.249736	0.141099	0.0337598	0.424594	0.275272
XLX-S5	0.0158623	0.010313	0.0261753	0.0392785	0.0475558	0.0868342	0.128496	0.241505	0.253796	0.0772962	0.339773	0.670865	0.0876299
	0.0218547	0.0118726	0.0337273	0.0425046	0.0560911	0.0985956	0.0952824	0.227605	0.321589	0.0714642	0.289596	0.682649	0.0897457
	0.0177269	0.00635533	0.0240823	0.0392135	0.0554984	0.0947119	0.10909	0.227884	0.255449	0.084051	0.33744	0.67694	0.0951754
XLX-S6	0.0104388	0.00262498	0.0130638	0.0166151	0.0168866	0.0335017	0.240524	0.287089	0.178159	0.060452	0.24613	0.484741	0.22817
	0.00809947	0.00278868	0.0108882	0.0156043	0.0175933	0.0331976	0.269407	0.313493	0.175113	0.0373191	0.24442	0.456851	0.229656
	0.0127782	0.00246128	0.0152395	0.0176259	0.0161799	0.0338057	0.21164	0.260685	0.181206	0.0835849	0.24784	0.512631	0.226684
XLX-S8	0.0103006	0.00486993	0.0151705	0.0144956	0.0179429	0.0324385	0.13768	0.185289	0.211826	0.15617	0.153262	0.521259	0.293453
	0.00865403	0.0187851	0.0274391	0.0169752	0.00442063	0.0213959	0.0969953	0.14583	0.483877	0.0307884	0.19846	0.713126	0.141044
	0.00788091	0.00451963	0.0124005	0.0166099	0.0250079	0.0416178	0.0466059	0.100624	0.437277	0.0670188	0.260215	0.764511	0.134865
XLX-S9	0.0100426	0.00489358	0.0149361	0.0187059	0.0176537	0.0363596	0.0897229	0.141019	0.337953	0.0637493	0.216993	0.618695	0.240286
	0.0107386	0.004725	0.0154636	0.0190841	0.0113523	0.0304364	0.0733273	0.119227	0.415636	0.0695455	0.152591	0.637773	0.243
	0.0133275	0.00572491	0.0190524	0.0193994	0.0198178	0.0392171	0.0918729	0.150142	0.377578	0.0563306	0.208587	0.642496	0.207362
XLX-S10	0.0167198	0.00456927	0.0212891	0.0200392	0.0272107	0.0472499	0.377002	0.445541	0.137693	0.04098	0.137693	0.316365	0.238094
	0.0234536	0.00584038	0.0292939	0.0270948	0.0315135	0.0586083	0.241938	0.32984	0.208658	0.0728257	0.140742	0.422225	0.247935
	0.0140812	0.00827885	0.0223601	0.0314883	0.0332894	0.0647776	0.259969	0.347107	0.204259	0.0307003	0.169466	0.404425	0.248468
XLX-S11	0.0138623	0.00885382	0.0227161	0.0240782	0.038873	0.0629512	0.263446	0.349113	0.158426	0.0406542	0.303021	0.502101	0.148786
	0.014126	0.00806456	0.0221906	0.0258316	0.0362227	0.0620543	0.288535	0.37278	0.347621	0.0392274	0.142303	0.529152	0.0980684
	0.0219325	0.00759121	0.0295237	0.0324418	0.039223	0.0716647	0.253299	0.354488	0.415803	0.00581543	0.15037	0.571989	0.0735236
XLX-S12	0.0202058	0.0073796	0.0275854	0.0321964	0.0261659	0.0583623	0.0961552	0.182103	0.212226	0.118798	0.283103	0.614128	0.20377
	0.0219011	0.00557337	0.0274745	0.0237421	0.0301002	0.0538423	0.0780506	0.159367	0.309453	0.072836	0.251506	0.633794	0.206838
	0.0187416	0.00915056	0.0278922	0.0386546	0.0256696	0.0643242	0.163725	0.255942	0.273916	0.140162	0.173	0.587077	0.156981
XLX-S13	0.010981	0.00603955	0.0170205	0.0309806	0.0579959	0.0889765	0.091577	0.197574	0.308281	0.0748334	0.235888	0.619003	0.183423
	0.0148632	0.00588843	0.0207516	0.0343864	0.0425896	0.076976	0.136776	0.234504	0.261934	0.0722856	0.261121	0.595341	0.170155
	0.0170214	0.00502003	0.0220414	0.0317054	0.0580047	0.0897101	0.0813857	0.193137	0.259741	0.091458	0.269903	0.621101	0.185761
XLX-S14	0.020521	0.0108773	0.0313983	0.0376066	0.0268619	0.0644684	0.170147	0.266014	0.263012	0.0526023	0.203477	0.519091	0.214895
	0.0317858	0.016284	0.0480699	0.0338683	0.0279663	0.0618346	0.222888	0.332792	0.174726	0.0646078	0.200731	0.440065	0.227143
	0.0240197	0.010508	0.0345277	0.033876	0.0291413	0.0630174	0.211697	0.309242	0.259849	0.0126259	0.208938	0.481412	0.209345
XLX-S15	0.010775	0.00408034	0.0148553	0.019438	0.0284906	0.0479286	0.12894	0.191723	0.444942	0.0418286	0.298542	0.785312	0.0229647
	0.00982943	0.00498654	0.014816	0.0170527	0.0256509	0.0427036	0.141351	0.198871	0.379223	0.0738746	0.32628	0.779377	0.021752
	0.00883653	0.00252325	0.0113598	0.0169521	0.0281883	0.0451404	0.142585	0.199085	0.414431	0.0580863	0.30073	0.773247	0.0276674
XLX-S17	0.00397209	0.00233	0.00630209	0.0213916	0.0480867	0.0694783	0.176401	0.252181	0.31111	0.0168648	0.211697	0.539672	0.208147
	0.00596479	0.00704022	0.013005	0.0364096	0.0555568	0.0919664	0.191671	0.296643	0.254113	0.0470087	0.199122	0.500244	0.203113
	0.00392773	0.00290117	0.0068289	0.0252178	0.0384739	0.0636918	0.149735	0.220256	0.338321	0.0397237	0.178087	0.556131	0.223613
XLX-S18	0.0135725	0.00789933	0.0214718	0.0295866	0.0456315	0.0752181	0.0489512	0.145641	0.271655	0.0718121	0.269603	0.61307	0.241289
	0.0153567	0.00709081	0.0224475	0.0329013	0.0451077	0.078009	0.0733631	0.17382	0.0692873	0.260942	0.275529	0.605758	0.220423
	0.0127465	0.00498819	0.0177347	0.0272	0.0276395	0.0548395	0.0557185	0.128293	0.325459	0.0772761	0.226513	0.629248	0.242459

## Sheet: K
		（mm）	2~0.05mm	0.05~0.002mm	<0.002mm				gravel	coarse silt	Coarse sand	Medium sand	fine sand	sand	silt	clay
land use	name		SAN	SIL	CLA	K	Convert to international system		2-1mm	1~0.25mm	1-0.5mm	0.5-0.25mm	0.25-0.05mm	2~0.05 mm	0.05~0.002mm	<0.002mm
CF	1	1	0.455102	0.342402	0.202496	0.323953	0.0426646	0.00817427	0.116261	0.169013	0.106985	0.0620272	0.169828	0.455102	0.342402	0.202496
		2	0.471486	0.348525	0.179989	0.328595	0.0432759	0.00848956	0.102553	0.180388	0.11326	0.0671278	0.188545	0.471486	0.348525	0.179989
		3	0.43629	0.377171	0.18654	0.330207	0.0434882	0.00859904	0.0916029	0.176814	0.113264	0.0635504	0.167873	0.43629	0.377171	0.18654
	2	4	0.375657	0.457093	0.16725	0.33956	0.04472	0.00923434	0.0253297	0.0469627	0.0264356	0.0206271	0.303364	0.375657	0.457093	0.16725
		5	0.305358	0.524457	0.170185	0.343078	0.0451834	0.00947332	0.0313726	0.0614815	0.0387129	0.0227686	0.212504	0.305358	0.524457	0.170185
		6	0.310364	0.502587	0.187048	0.339431	0.0447031	0.00922564	0.0583052	0.114514	0.0676049	0.0469095	0.137545	0.310364	0.502587	0.187048
	3	7	0.284722	0.496984	0.218294	0.334738	0.0440849	0.00890681	0.0483287	0.174872	0.103064	0.0718082	0.0615211	0.284722	0.496984	0.218294
		8	0.300134	0.424594	0.275272	0.321313	0.0423169	0.00799496	0.17937	0.0757647	0.0545026	0.0212622	0.0449987	0.300134	0.424594	0.275272
		9	0.359609	0.401543	0.238849	0.324214	0.042699	0.00819203	0.0677279	0.207954	0.119078	0.0888759	0.0839268	0.359609	0.401543	0.238849
	4	10	0.313493	0.456851	0.229656	0.330291	0.0434993	0.00860477	0.0108882	0.0331976	0.0156043	0.0175933	0.269407	0.313493	0.456851	0.229656
		11	0.317089	0.454741	0.22817	0.330335	0.0435051	0.00860775	0.0430638	0.0335017	0.0166151	0.0168866	0.240524	0.317089	0.454741	0.22817
		12	0.320685	0.452631	0.226684	0.330379	0.0435109	0.00861073	0.0752395	0.0338057	0.0176259	0.0161799	0.21164	0.320685	0.452631	0.226684
		average value	0.354166	0.436632	0.209203	0.331341	0.0436376	0.0086761	0.0708369	0.109022	0.0660627	0.042968	0.174306	0.354166	0.436632	0.209203
		standard deviation	0.0656302	0.0592921	0.0324676	0.00674263			0.0466771	0.0686025	0.0427482	0.0265354	0.0809954	0.0656302	0.0592921	0.0324676
		CV	0.185309	0.135794	0.155197	0.0203495			0.658938	0.629251	0.647085	0.617562	0.464672	0.185309	0.135794	0.155197
EF	1	1	0.349113	0.502101	0.148786	0.345067	0.0454454	0.00960845	0.0227161	0.0629512	0.0240782	0.038873	0.263446	0.349113	0.502101	0.148786
		2	0.37278	0.529152	0.0980684	0.354332	0.0466655	0.0102377	0.0221906	0.0620543	0.0258316	0.0362227	0.288535	0.37278	0.529152	0.0980684
		3	0.360946	0.515626	0.123427	0.3497	0.0460555	0.0099231	0.0224533	0.0625028	0.0249549	0.0375479	0.27599	0.360946	0.515626	0.123427
	2	4	0.266014	0.519091	0.214895	0.336616	0.0443324	0.00903442	0.0313983	0.0644684	0.0376066	0.0268619	0.170147	0.266014	0.519091	0.214895
		5	0.332792	0.440065	0.227143	0.329307	0.0433698	0.00853796	0.0480699	0.0618346	0.0338683	0.0279663	0.222888	0.332792	0.440065	0.227143
		6	0.309242	0.481412	0.209345	0.334918	0.0441088	0.00891909	0.0345277	0.0630174	0.033876	0.0291413	0.211697	0.309242	0.481412	0.209345
	3	7	0.165641	0.61307	0.221289	0.343895	0.045291	0.00952885	0.0214718	0.0752181	0.0295866	0.0456315	0.0489512	0.145641	0.61307	0.241289
		8	0.16973	0.609414	0.220856	0.343763	0.0452736	0.00951987	0.0219596	0.0766135	0.031244	0.0453696	0.0611572	0.15973	0.609414	0.230856
		9	0.17382	0.605758	0.220423	0.343631	0.0452562	0.00951088	0.0224475	0.078009	0.0329013	0.0451077	0.0733631	0.17382	0.605758	0.220423
		average value	0.331815	0.497908	0.170278	0.341657	0.0449962	0.00937679	0.0274705	0.0674077	0.0304386	0.0369691	0.179575	0.274453	0.535077	0.19047
		standard deviation	0.0391567	0.0327853	0.0540771	0.00959484			0.00906093	0.00697933	0.00466568	0.00758979	0.0958941	0.0917123	0.0615104	0.0526531
		CV	0.118008	0.0658462	0.317582	0.0280833			0.329842	0.103539	0.153281	0.205301	0.534006	0.334164	0.114956	0.276438
ST	1	1	0.185289	0.521259	0.293453	0.334196	0.0440137	0.00887005	0.0151705	0.0324385	0.0144956	0.0179429	0.13768	0.185289	0.521259	0.293453
		2	0.14583	0.613126	0.241044	0.346139	0.0455865	0.00968126	0.0274391	0.0213959	0.0169752	0.00442063	0.0969953	0.14583	0.613126	0.241044
		3	0.165559	0.567192	0.267248	0.340168	0.0448001	0.00927566	0.0213048	0.0269172	0.0157354	0.0111818	0.117338	0.165559	0.567192	0.267248
	2	4	0.141019	0.618695	0.240286	0.346814	0.0456754	0.00972706	0.0149361	0.0363596	0.0187059	0.0176537	0.0897229	0.141019	0.618695	0.240286
		5	0.119227	0.637773	0.243	0.347483	0.0457635	0.00977251	0.0154636	0.0304364	0.0190841	0.0113523	0.0733273	0.119227	0.637773	0.243
		6	0.150142	0.642496	0.207362	0.35184	0.0463373	0.0100685	0.0190524	0.0392171	0.0193994	0.0198178	0.0918729	0.150142	0.642496	0.207362
	3	7	0.191723	0.5853	0.222965	0.397652	0.0523707	0.0131802	0.0148553	0.0479286	0.019438	0.0284906	0.12894	0.191723	0.585312	0.222965
		8	0.195297	0.58235	0.222358	0.397553	0.0523577	0.0131735	0.0148356	0.0453161	0.0182454	0.0270708	0.135145	0.195297	0.582344	0.222358
		9	0.198871	0.5794	0.221752	0.397454	0.0523447	0.0131668	0.014816	0.0427036	0.0170527	0.0256509	0.141351	0.198871	0.579377	0.221752
		average value	0.163459	0.603291	0.233252	0.365638	0.0481545	0.0110057	0.0175415	0.035857	0.0176813	0.0181757	0.112486	0.165884	0.594175	0.239941
		standard deviation	0.0293235	0.028526	0.0184701	0.0266163			0.00437466	0.00882988	0.00173935	0.00813248	0.0249802	0.0283784	0.0382073	0.0264799
		CV	0.179394	0.0472839	0.0791853	0.0727943			0.249389	0.246253	0.0983726	0.447437	0.222074	0.171074	0.0643032	0.11036
NF	1	1	0.348864	0.451792	0.199344	0.334271	0.0440235	0.00887512	0.0301059	0.0774297	0.043147	0.0342827	0.241328	0.348864	0.451792	0.199344
		2	0.311234	0.486957	0.201809	0.336352	0.0442976	0.00901647	0.042047	0.0686621	0.0402699	0.0283922	0.200525	0.311234	0.486957	0.201809
		3	0.33006	0.471001	0.19894	0.3357	0.0442117	0.00897217	0.0299226	0.0528191	0.0265321	0.026287	0.247318	0.33006	0.471001	0.19894
	2	4	0.445541	0.316365	0.238094	0.314754	0.0414531	0.00754943	0.0212891	0.0472499	0.0200392	0.0272107	0.377002	0.445541	0.316365	0.238094
		5	0.32984	0.422225	0.247935	0.324828	0.0427799	0.00823372	0.0292939	0.0586083	0.0270948	0.0315135	0.241938	0.32984	0.422225	0.247935
		6	0.347107	0.404425	0.248468	0.323093	0.0425514	0.00811589	0.0223601	0.0647776	0.0314883	0.0332894	0.259969	0.347107	0.404425	0.248468
	3	7	0.252181	0.539672	0.208147	0.338735	0.0446114	0.00917834	0.00630209	0.0694783	0.0213916	0.0480867	0.176401	0.252181	0.539672	0.208147
		8	0.296643	0.500244	0.203113	0.337029	0.0443867	0.00906244	0.013005	0.0919664	0.0364096	0.0555568	0.191671	0.296643	0.500244	0.203113
		9	0.220256	0.556131	0.223613	0.337706	0.0444759	0.00910846	0.0068289	0.0636918	0.0252178	0.0384739	0.149735	0.220256	0.556131	0.223613
		average value	0.304523	0.479056	0.216421	0.333464	0.0439173	0.00882033	0.0224832	0.0684292	0.0314439	0.0369853	0.213611	0.304523	0.479056	0.216421
		standard deviation	0.0433306	0.0496663	0.0197741	0.00564147			0.0119337	0.0112476	0.00726613	0.00941779	0.0370358	0.0433306	0.0496663	0.0197741
		CV	0.14229	0.103675	0.0913687	0.0169178			0.530785	0.164368	0.231082	0.254636	0.17338	0.14229	0.103675	0.0913687
VF	1	1	0.241505	0.670865	0.0876299	0.394706	0.0519828	0.0129802	0.0261753	0.0868342	0.0392785	0.0475558	0.128496	0.241505	0.670865	0.0876299
		2	0.227605	0.682649	0.0897457	0.394702	0.0519822	0.0129798	0.0337273	0.0985956	0.0425046	0.0560911	0.0952824	0.227605	0.682649	0.0897457
		3	0.227884	0.67694	0.0951754	0.39375	0.0518568	0.0129152	0.0240823	0.0947119	0.0392135	0.0554984	0.10909	0.227884	0.67694	0.0951754
	2	4	0.182103	0.614128	0.20377	0.343157	0.0451938	0.0094787	0.0275854	0.0583623	0.0321964	0.0261659	0.0961552	0.182103	0.614128	0.20377
		5	0.159367	0.633794	0.206838	0.343699	0.0452652	0.00951551	0.0274745	0.0538423	0.0237421	0.0301002	0.0780506	0.159367	0.633794	0.206838
		6	0.255942	0.587077	0.156981	0.347907	0.0458193	0.0098013	0.0278922	0.0643242	0.0386546	0.0256696	0.163725	0.255942	0.587077	0.156981
	3	7	0.197574	0.619003	0.183423	0.345867	0.0455507	0.00966276	0.0170205	0.0889765	0.0309806	0.0579959	0.091577	0.197574	0.619003	0.183423
		8	0.234504	0.595341	0.170155	0.346517	0.0456363	0.00970693	0.0207516	0.076976	0.0343864	0.0425896	0.136776	0.234504	0.595341	0.170155
		9	0.193137	0.621101	0.185761	0.345669	0.0455247	0.00964935	0.0220414	0.0897101	0.0317054	0.0580047	0.0813857	0.193137	0.621101	0.185761
		average value	0.232332	0.676818	0.0908503	0.394386	0.0519406	0.0129584	0.027995	0.0933806	0.0403322	0.0530484	0.110956	0.232332	0.676818	0.0908503
		standard deviation	0.00794583	0.00589304	0.00389215	0.000551133			0.00507349	0.00599266	0.00188162	0.00476599	0.0166851	0.00794583	0.00589304	0.00389215
		CV	0.0342004	0.00870697	0.0428413	0.00139745			0.181229	0.0641746	0.0466531	0.0898423	0.150376	0.0342004	0.00870697	0.0428413
